# Supplementary material for: Impaired expression of metallothioneins contributes to allergen-induced inflammation in patients with atopic dermatitis
Source: PubMed Central journal article supplement (PMC10199008; doi:10.1038/s41467-023-38588-1), 2023-05-19
Supplement: 41467_2023_38588_MOESM1_ESM.pdf [file 41467_2023_38588_MOESM1_ESM.pdf]

1 **Supplementary Materials**  
2

3 **Impaired expression of metallothioneins contributes to Th17/TNF-**  
4 **mediated, allergen - induced inflammation in patients with atopic**  
5 **dermatitis.**

6 **Author List:** Sofia Sirvent<sup>1#</sup>, Andres Vallejo<sup>1#</sup>, Emma Corden<sup>2</sup>, Ying Teo<sup>1,2</sup>, James  
7 Davies<sup>1,3</sup>, Kalum Clayton<sup>1</sup>, Eleanor Seaby<sup>4</sup>, Chester Lai<sup>1</sup>, Sarah Ennis<sup>4</sup>, Rfeef Alyami<sup>1</sup>,  
8 Gemma Douilhet<sup>1</sup>, Lareb S N Dean<sup>1</sup>, Matthew Loxham<sup>1</sup>, Sarah Horswill<sup>2</sup>, Eugene  
9 Healy<sup>1</sup>, Graham Roberts<sup>2,4</sup>, Nigel J. Hall<sup>2,5</sup>, Peter S. Friedmann<sup>1</sup>, Harinder Singh<sup>6</sup>, Clare  
10 L. Bennett<sup>3</sup>, Michael Ardern-Jones<sup>1,2,7</sup>, Marta E Polak<sup>1,7,§,\*</sup>

- 11  
12 1. Clinical and Experimental Sciences, Faculty of Medicine, University of  
13 Southampton; Southampton, UK  
14 2. University Hospital Southampton NHS Foundation Trust, Southampton, UK  
15 3. Department of Haematology, University College London (UCL) Cancer Institute;  
16 London WC1E 6DD, UK  
17 4. Human Development and Health, Faculty of Medicine, University of  
18 Southampton; Southampton, UK  
19 5. University Surgery Unit, Faculty of Medicine, University of Southampton,  
20 Southampton, UK  
21 6. Departments of Immunology and Computational and Systems Biology, The  
22 University of Pittsburgh; Pittsburgh, USA  
23 7. Institute for Life Sciences, University of Southampton; Southampton, UK

24 # These authors contributed equally

25  
26 \*Correspondence to  
27 MEP: [m.e.polak@soton.ac.uk](mailto:m.e.polak@soton.ac.uk)  
28 Dr. Marta E Polak  
29 Systems Immunology Group  
30 Clinical and Experimental Sciences  
31 Faculty of Medicine  
32 University of Southampton,  
33 SO16 6YD, Southampton, UK

34  
35 § Current address:  
36 Janssen R&D  
37 1400 McKean Road  
38 Spring House, PA 19477  
39 [mpolak1@its.jnj.com](mailto:mpolak1@its.jnj.com)  
40  
41  
42

43 **Supplementary Figures**

44 Supplementary Figure 1. In vivo allergen challenge model to investigate mechanisms of  
45 local immune responses in human skin.

46 Supplementary Figure 2 Reactivity to HDM is associated with co-expansion of T cells and  
47 LCs.

48 Supplementary Figure 3 Activated TNF-expressing Th17 cells are significantly enriched  
49 in reactive patients.

50 Supplementary Figure 4 HDM reactivity in reactive patients is mediated by LC : T cell  
51 TNF crosstalk and impairs LC transcriptional programming.

52 Supplementary Figure 5 Enhanced expression of metallothionein genes protects non-  
53 reactive patients from inflammation and prevents HDM-induced oxidative stress.

54

55 **Supplementary Data: attached as csv files**

|                       |                                                               |
|-----------------------|---------------------------------------------------------------|
| Supplementary Data 1  | Patient characteristics                                       |
| Supplementary Data 2  | FLG mutations                                                 |
| Supplementary Data 3  | KC signatures                                                 |
| Supplementary Data 4  | Panel of genes for Constellation-seq                          |
| Supplementary Data 5  | Constellation seq analysis: Cluster defining marker genes     |
| Supplementary Data 6  | Gene Ontology analysis in DEG from patients responding to HDM |
| Supplementary Data 7  | LC transcriptional programme in control samples               |
| Supplementary Data 8  | BioLayout modules and Gene Ontology analysis                  |
| Supplementary Data 9  | LC signature for Tcell:LC cross-talk                          |
| Supplementary Data 10 | WGCNA modules and Gene Ontology analysis                      |
| Supplementary Data 11 | DEGs in KC Constellation-seq                                  |
| Supplementary Data 12 | WGCNA module Turquoise: Top 50 genes                          |
| Supplementary Data 13 | Gene signatures for GWAS                                      |
| Supplementary Data 14 | Antibodies used in the study                                  |

56

57

58

59

Supplementary Figure 1

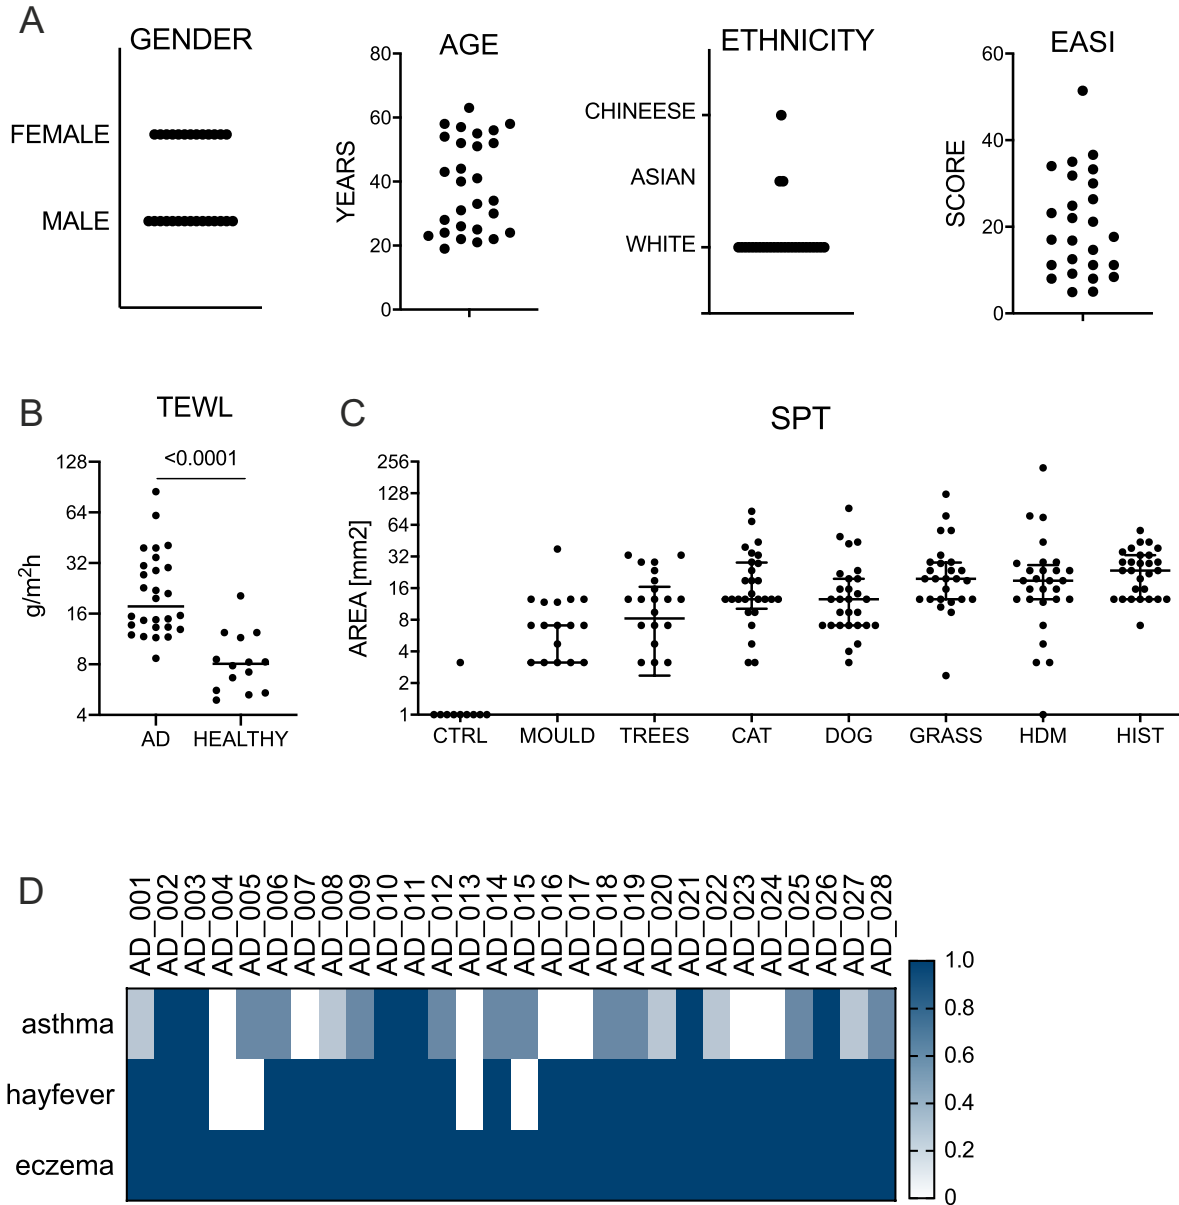

63  
64  
65 **Supplementary Figure 1. *In vivo* allergen challenge model to investigate mechanisms of local**  
66 **immune responses in human skin.**  
67 Patient cohort characteristics: A) age, gender, ethnicity, EASI score, n=28. B) trans-epidermal water loss  
68 (TEWL) in patients with AD (n=28) and healthy controls (n=14), Mann-Whitney U test, two-sided  
69 Skin Prick Test (SPT) responses to stimulation with 6 most common allergens (wheal area given). D)  
70 Recorded responses to ISAAC questionnaire, 1 represents 100% of positive responses to questions in a  
71 category. Source data are provided as a Source Data file.  
72

Supplementary Figure 2

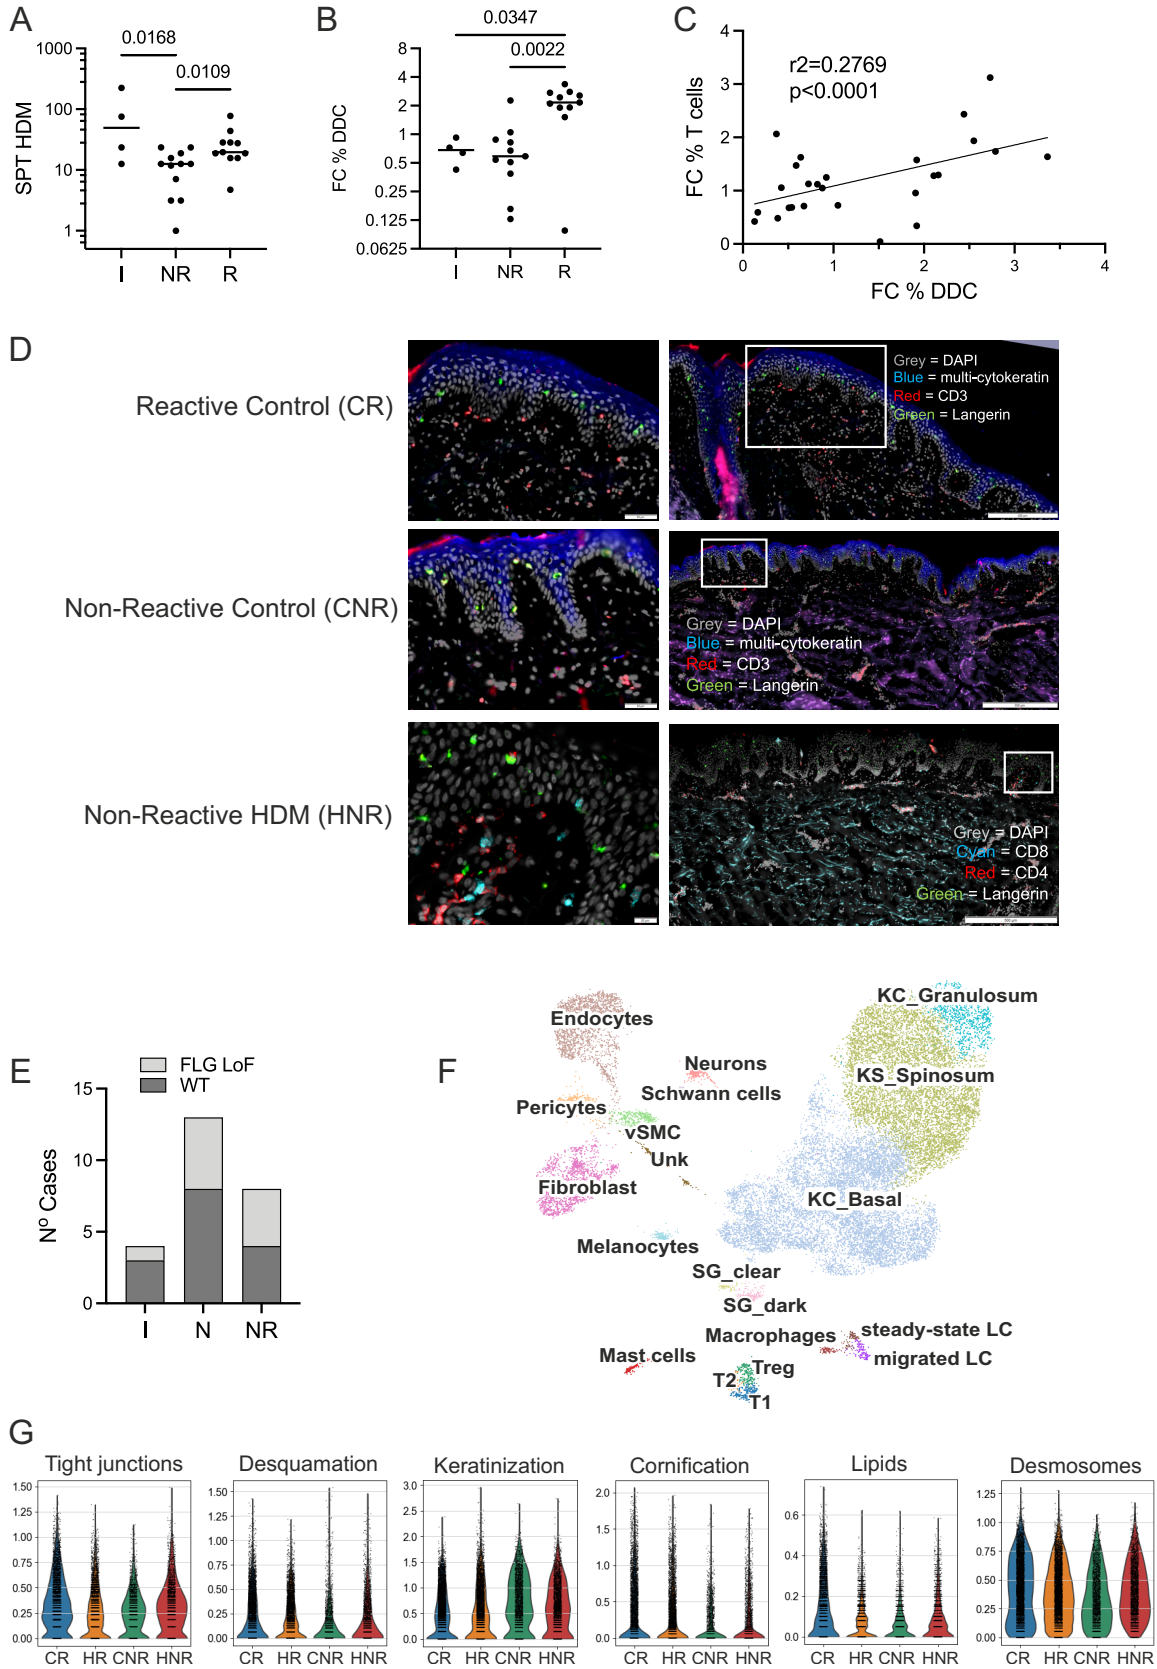

74 **Supplementary Figure 2 Reactivity to HDM is associated with co-expansion of T cells and LCs.**  
75 A) Skin prick test responses to HDM across patient groups, wheal area mm<sup>2</sup>. I n=4, NR n=12, R n=11  
76 Kruskal-Wallis test with post-hoc Dunn test. B) Fold changes in percentage of detected DDC between  
77 HDM patch test and control patch test from patients with irritant, non-reactive and reactive reactions to  
78 HDM. I n=4, NR n=12, R n=11 Kruskal-Wallis test with post-hoc Dunn test. C) Correlations between fold  
79 changes in percentage of CD3+ T cells and DDCs. Pearson correlation coefficient shown for linear  
80 regression. 7 SNP measured using Whole Genome Sequencing, n=27 patients. D) Immunofluorescence  
81 staining of patch test sites from reactive and non-reactive patients. Inserts show the indicated optical  
82 fields. CD207 (green) and CD3 (red). Epidermal layer stained with multi-cytokeratin (blue). DAPI stain for  
83 nuclei (grey). Scale bars: 500µm, 50µm, 20µm (inserts). In patch test from HDM exposed non-reactive  
84 patient example of interaction between CD4 (red) and CD8 (cyan) T cells shown. E) Number of irritant (I),  
85 non-reactive (N), and reactive (NR) cases with loss of function (LoF) variants in FLG compared to  
86 wildtype (WT). F) UMAP plot of Drop-seq data, depicting clustering of specific cell populations, n=3  
87 patients, 6 paired samples (Control and HDM) G) Violin plots showing Z score of KC inflammation  
88 signature across skin layers, CR: control reactive, HR: HDM reactive, CNR: control non-reactive, HNR:  
89 HDM non-reactive. Z scores for keratinocyte gene expression programmes, DropSeq whole transcriptome  
90 analysis, fresh tissue, n=6 paired biopsies from 3 donors CR: control reactive, HR: HDM reactive, CNR:  
91 control non-reactive, HNR: HDM non-reactive. Source data are provided as a Source Data file.  
92

# Supplementary Figure 3

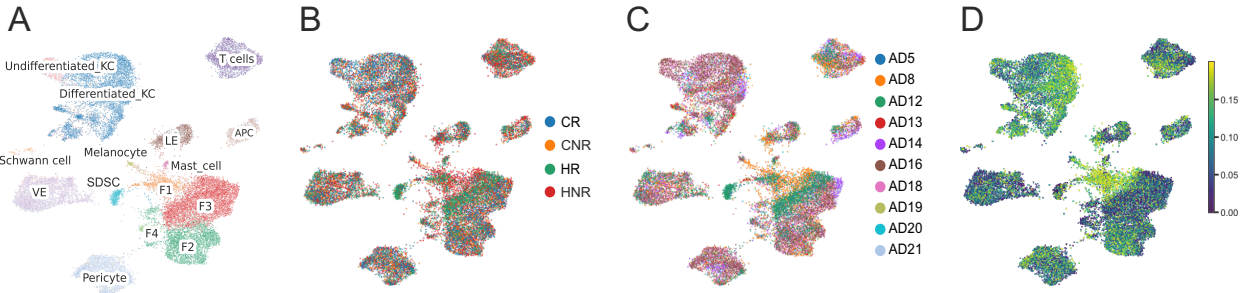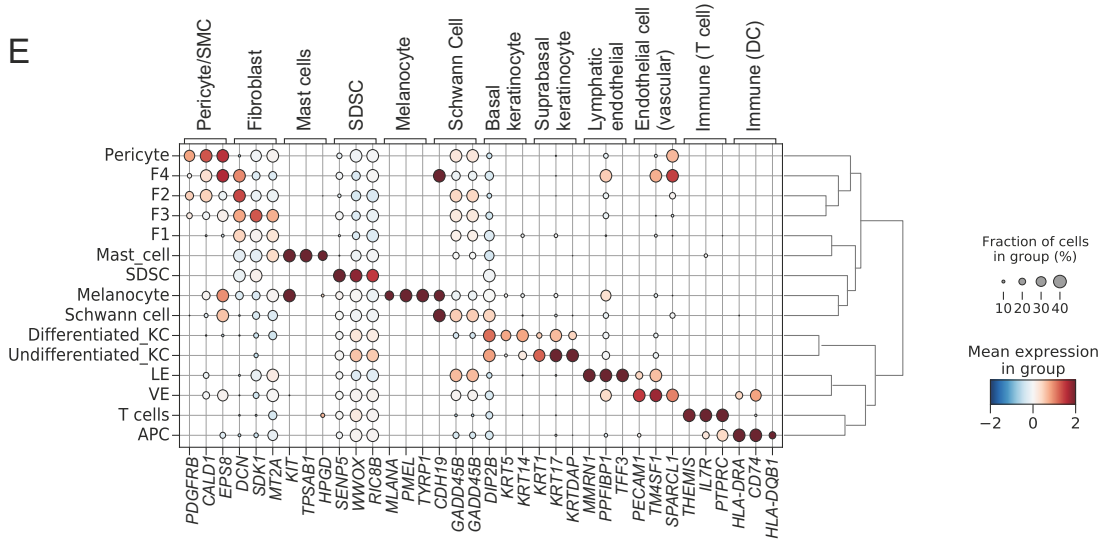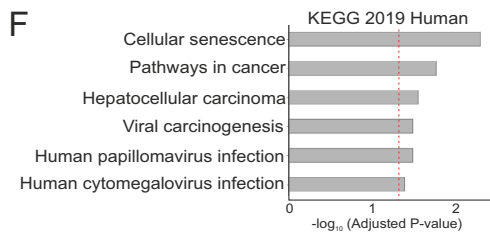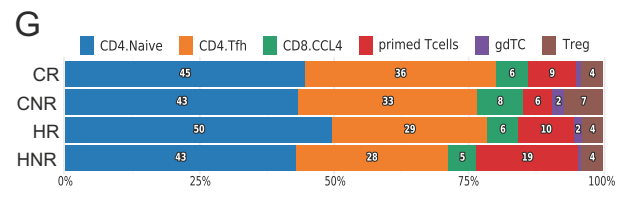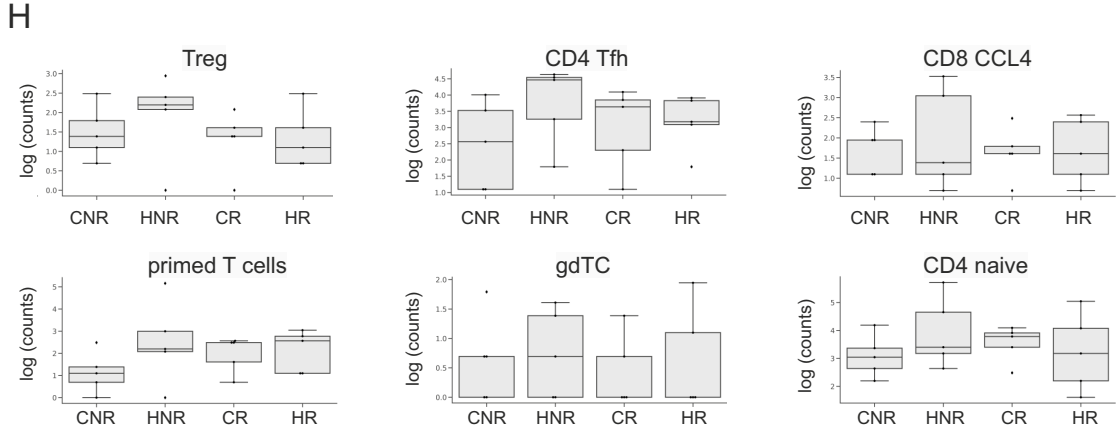

## Supplementary Figure 3

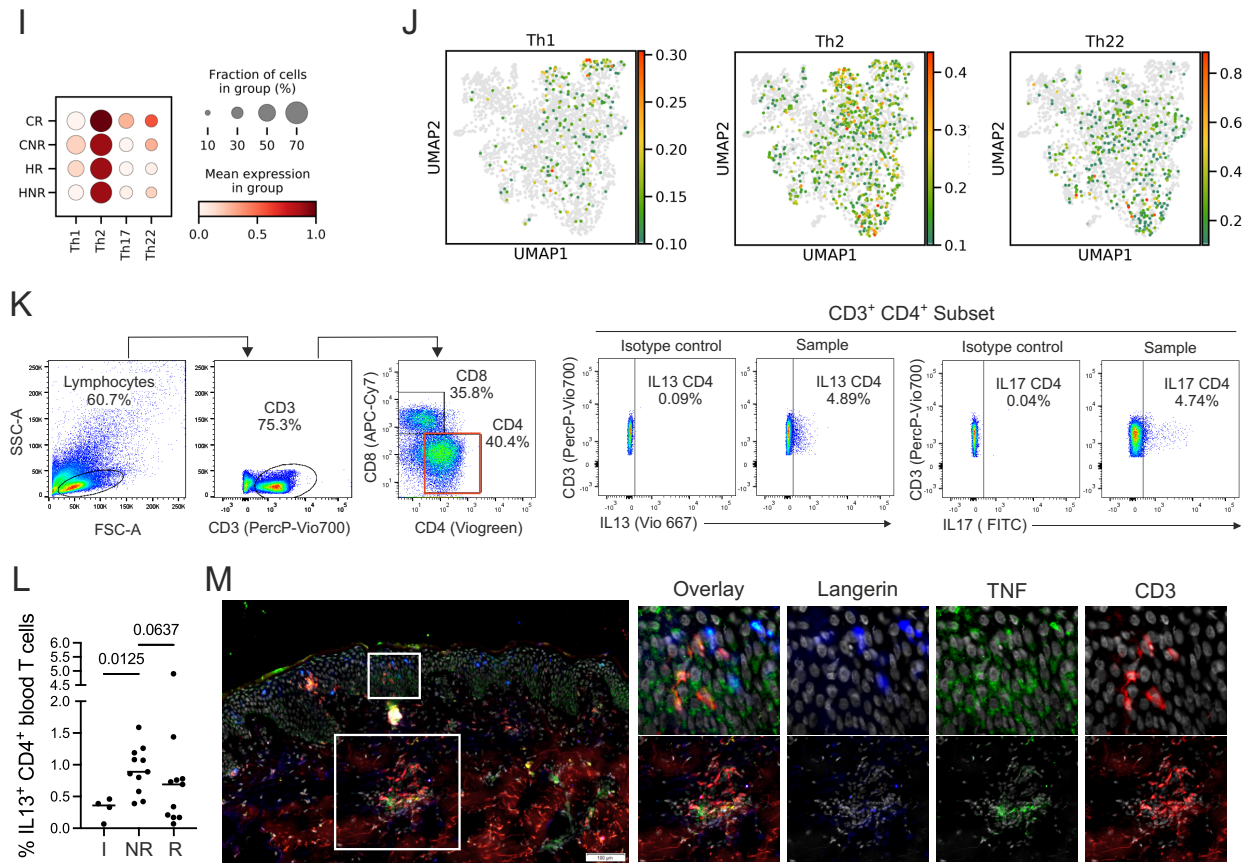

### Supplementary Figure 3 Activated TNF-expressing Th17 cells are significantly enriched in reactive patients

95  
96  
97  
98  
99  
100 A-E) Constellation-seq analysis enriched for 1161 transcripts in 25844 single cells from patch test skin  
101 biopsies, n=10 patients A) UMAP plot depicting clustering of specific cell populations B-D) Quality  
102 controls for constellation-seq analysis enriched for 1161 transcripts in 25844 single cells from patch test  
103 skin biopsies, n=10 patients B) BBKNN integration across treatment and condition C) BBKNN integration  
104 across donors D) percentage of mitochondrial genes across samples UMAP plot depicting clustering of  
105 specific cell populations E) Cell subset defining markers (Wilcoxon rank test, two sided). F) Top biological  
106 pathways enriched at the control site in DEGs from patient non-reactive (CNR) to HDM (KEGG  
107 database). P-value computed using the Fisher exact test, with Benjamini Hocheberg FDR correction. G) T  
108 cell subset composition across patient groups H) Composition of T cell subsets (HCA profiles) across  
109 patch test phenotypes. CR: control reactive, HR: HDM reactive, CNR: control non-reactive, HNR: HDM  
110 non-reactive, n=5 individual donors per group, paired. In boxplots, the central line denotes the median,  
111 boxes represent the interquartile range (IQR), and whiskers show the distribution except for outliers. I-J)  
112 Th immunotypes gene signature across patient groups, I) Th immunophenotype dotplot: size depict % of  
113 expressing cells, colour intensity encodes mean expression in group. J) UMAP plot of 2374 single T  
114 lymphocytes cells. Constellation-seq analysis enriched for 1161 transcripts from patch test skin biopsies,  
115 n=10 patients, 5 per group. Th immunotypes for T cell polarisation shown (Z-score, green to red). K)  
116 Gating strategy for flow cytometry analysis of intracellular cytokine staining. L) Expression of IL13 in  
117 CD3<sup>+</sup>CD4<sup>+</sup> blood T cells across study groups. Kruskal-Wallis test with post-hoc Dunn test M)  
118 Immunofluorescence staining of patch test sites from reactive and non-reactive patients. Inserts show the  
119 indicated optical fields. CD207 (blue), CD3 (red) and TNF (green). DAPI stain for nuclei (grey). Overlay

120 shown in yellow. Scale bars: 100 $\mu$ m. A representative of n=3 individual donors. Source data are provided  
121 as a Source Data file.



Supplementary Figure 4

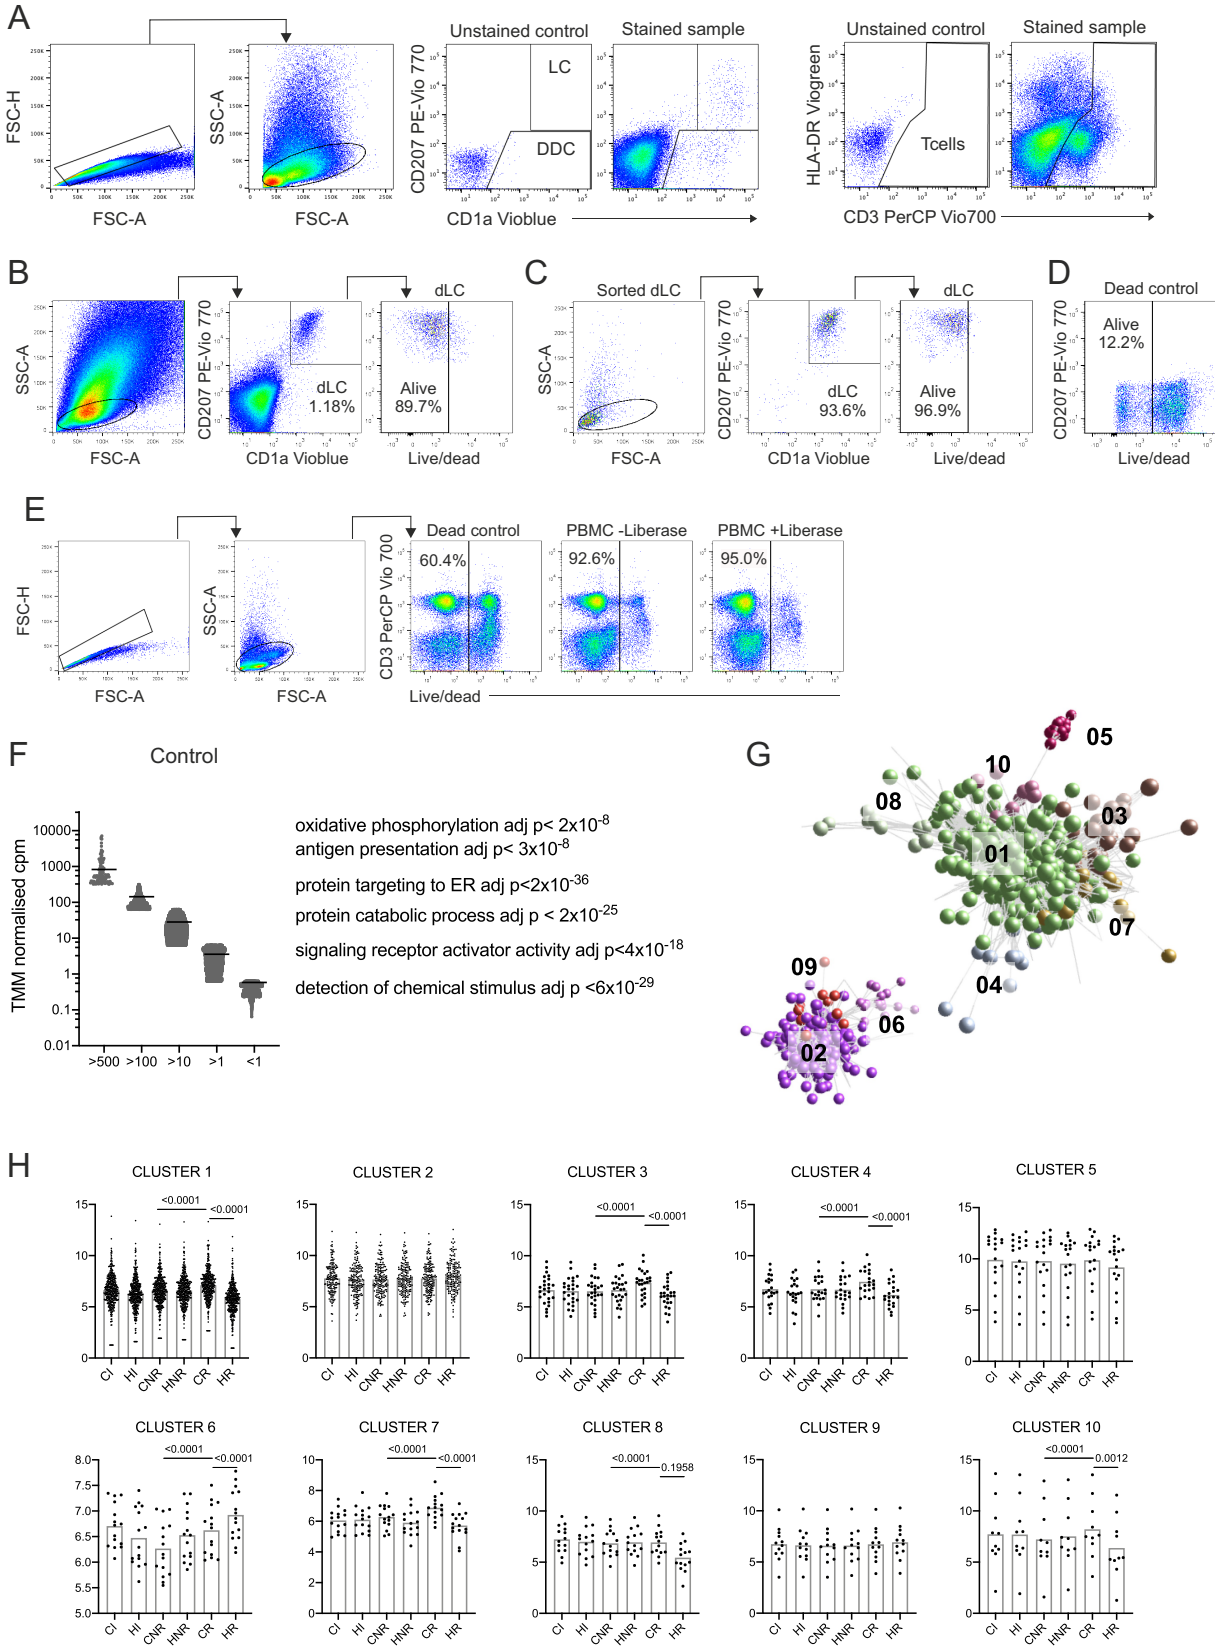

Supplementary Figure 4

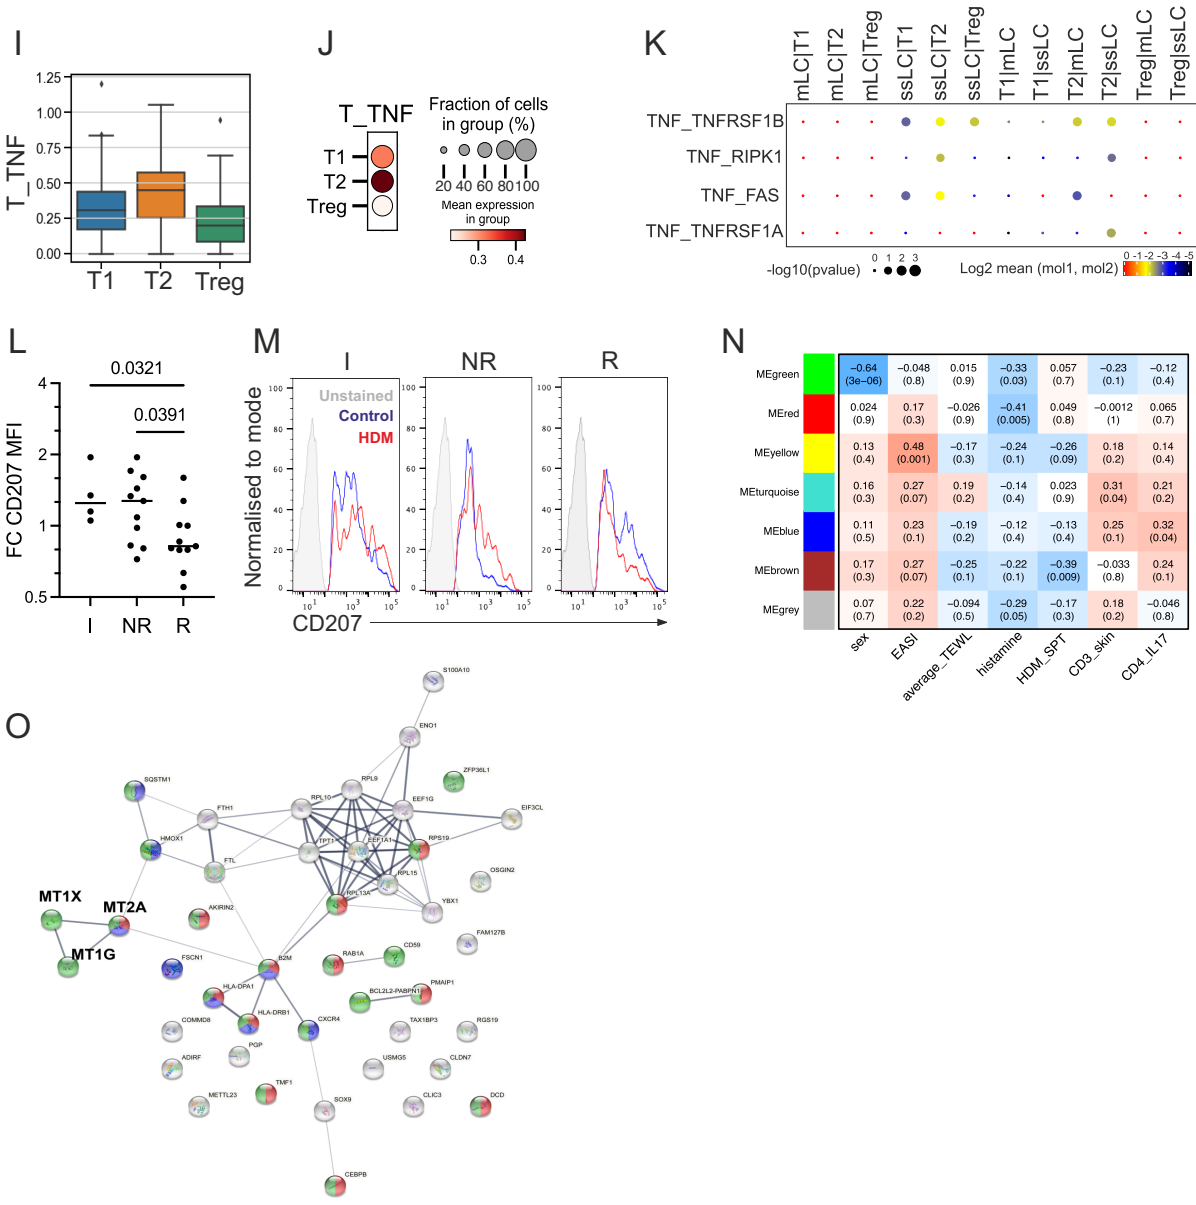

123  
124  
125  
126  
127  
128  
129  
130  
131  
132  
133  
134  
135

**Supplementary Figure 4 HDM reactivity in reactive patients is mediated by LC : T cell TNF crosstalk and impairs LC transcriptional programming**

A) Gating strategy for sorting CD207+CD1a+ Langerhans cells, B-D) Viability of LC post digestion procedure prior (B) and post (C) sorting in comparison with dead control (D), E) Viability and preservation of CD3 expression in blood PBMCs post digestion procedure F) Quantitative transcriptional profile of LC in the control skin across all patch tests. Average gene expression binned for the expression level shown. Gene ontology ranked with FDR adjusted p-values given for each gene expression level bracket. TMM-normalised counts. n = 22 independent biological donors (following RNA-seq data QC). TopGene, Benjamini-Hochberg-adjusted p-value G) Transcript-to-transcript correlation network of 10 largest clusters detected in LC transcriptomes. Lines (edges) represent the similarity between transcripts, circles (nodes) represent genes. H) Mean ( $\pm$  SEM) expression profiles for clusters 1-10, across sample groups. Each dot

136 represents an average gene expression. CI: control irritant, HI: HDM irritant, CR: control reactive, HR: HDM  
137 reactive, CNR: control non-reactive, HNR: HDM non-reactive. Dots represent average expression of  
138 transcript. Statistical comparison done using Mann Whitney test for paired samples. I n= 4, NR n = 11, R  
139 n=7 (following RNA-seq data QC). I-J) TNF expression across T cell clusters (single cell data, fresh full skin  
140 biopsy, n=6 paired biopsies from 3 patients, Drop-seq, I) The center line indicates the median, the edges  
141 of the box represent the first and third quartiles, and the whiskers extend to span a 1.5 interquartile range  
142 from the edges) K) Dotplot of TNF interactions detected between mature (mLC) and steady state LC (ssLC)  
143 and different T cell populations. The size of the dot indicates  $-\log(10)$  pvalue, as calculated by CellPhone  
144 DB package, denoting likelihood of cell-type specificity of a given receptor–ligand. Complex the color  
145 denotes  $\log(2)$  average activation strength. P-value computed using the Fisher exact test, with Benjamini  
146 Hocheberg FDR correction.  
147 L) HDM-induced change in CD207 expression levels measured by flow cytometry across patient groups  
148 n=27, t-test M) A representative histogram of CD207 expression in I, NR and R patients in control (blue)  
149 or HDM-challenged (red) skin, compared with unstained control (grey). Kruskal-Wallis test with post-hoc  
150 Dunn test. I n=4, NR n=11, R n=11 N) WGCNA analysis of correlation between clinical and experimental  
151 features, recorded as continuous variables and eigenvectors representing modules of co-expressed  
152 genes across LC transcriptomes. Each colour coded module (left) represents co-expressed genes.  
153 Clinical/experimental features are labelled across X axis. Pearson correlation coefficients and p-values  
154 univariate regression model with pairwise complete Student T test, are given for each correlation, the  
155 heatmap (blue to red) indicates correlation strength and direction. O) Protein interaction analysis  
156 (STRING) of 50 top genes in LC reversely correlated with CD3 T cell frequency identifies metallothionein  
157 functional importance for metal transition metal ion homeostasis (red), cytokine mediated signalling (blue)  
158 and responses to stress (green). Source data are provided as a Source Data file.  
159  
160  
161

Supplementary Figure 5

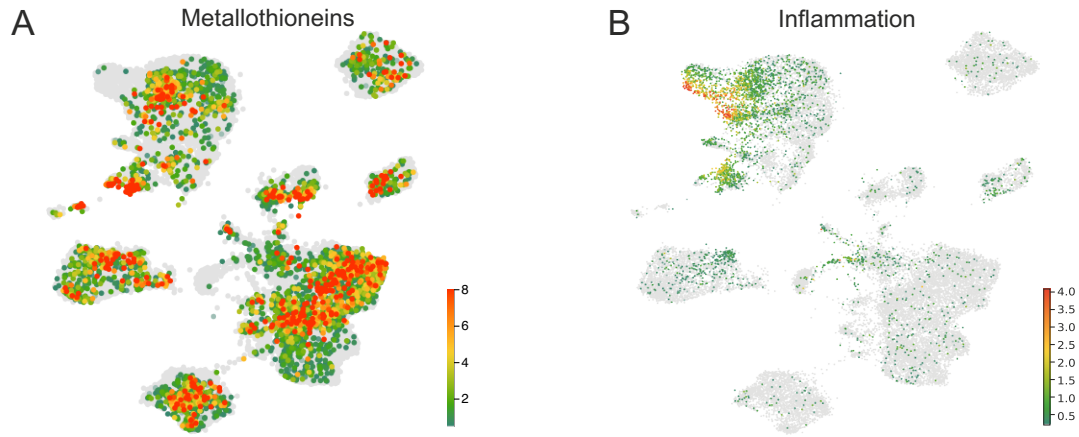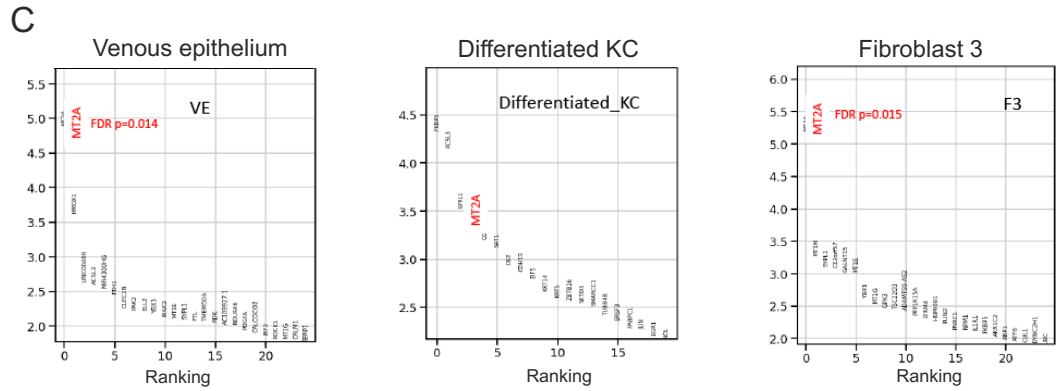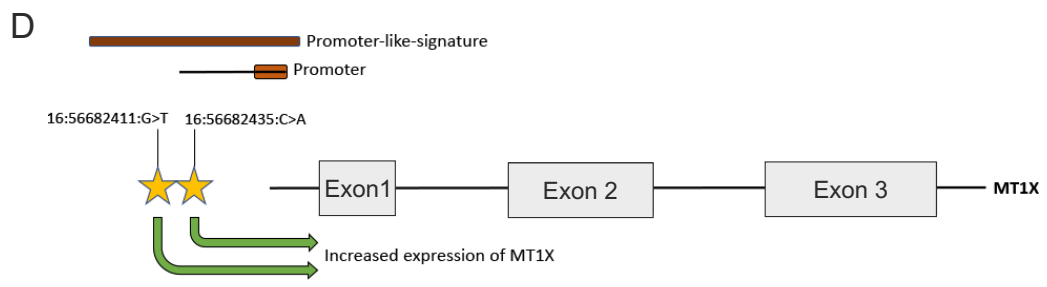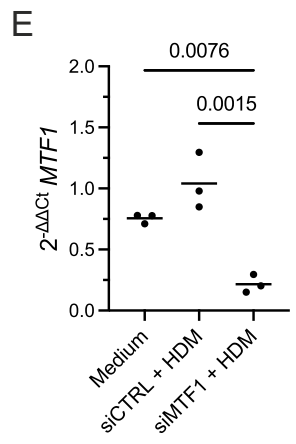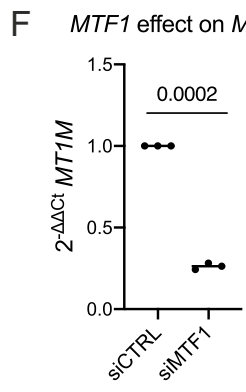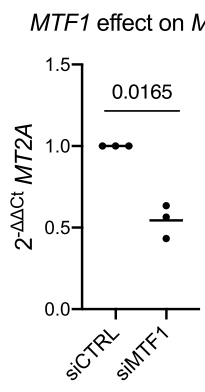

163 **Supplementary Figure 5 Enhanced expression of metallothionein genes protects non-reactive**  
164 **patients from inflammation and prevents HDM-induced oxidative stress**

165 A,C) Constellation-seq analysis enriched for 1161 transcripts in 25844 single cells from patch test skin  
166 biopsies, n=10 patients, 5 individual donors/group. Expression of A) metallothionein and B) inflammation  
167 signatures. C) Differentially expressed genes between specific cell cluster and all other clusters, MAST, p-  
168 value computed Wilcoxon signed rank test, with Bonferoni correction, n=5 individual donors/group. D)  
169 Schematic depicting localisation of SNP in promoter/enhancer region upstream of MT1X, significantly  
170 enriched in patients tolerant to HDM E-F) Effect of *MTF1* silencing on E) *MTF1* F) *MT1M* and *MT2A*  
171 expression in human fibroblasts (n=3 independent experiments, E) paired ANOVA with Tukey test, F)  
172 paired t test, two-sided). Source data are provided as a Source Data file.

173

174
