# Supplementary material for: Impaired expression of metallothioneins contributes to allergen-induced inflammation in patients with atopic dermatitis
Source: PubMed Central journal article supplement (PMC10199008; doi:10.1038/s41467-023-38588-1), 2023-05-19
Supplement: 41467_2023_38588_MOESM3_ESM.pdf [file 41467_2023_38588_MOESM3_ESM.pdf]

## **Description of Additional Supplementary Files**

**Supplementary Data 1** Patient characteristics

**Supplementary Data 2** FLG mutations

**Supplementary Data 3** KC signatures

**Supplementary Data 4** Panel of genes for Constellation-seq

**Supplementary Data 5** Constellation seq analysis: Cluster defining marker genes

**Supplementary Data 6** Gene Ontology analysis in DEG from patients responding to HDM

**Supplementary Data 7** LC transcriptional programme in control samples

**Supplementary Data 8** BioLayout modules and Gene Ontology analysis

**Supplementary Data 9** LC signature for Tcell:LC cross-talk

**Supplementary Data 10** WGCNA modules and Gene Ontology analysis

**Supplementary Data 11** DEGs in KC Constellation-seq

**Supplementary Data 12** WGCNA module Turquoise: Top 50 genes

**Supplementary Data 13** Gene signatures for GWAS

**Supplementary Data 14** Antibodies used in the study
